# Supplementary material
Source: Springer Nature journal article supplement (https://www.springermedizin.de/resource/supplementary/10194_2014_1023_MOESM1_ESM.pdf/9423400)

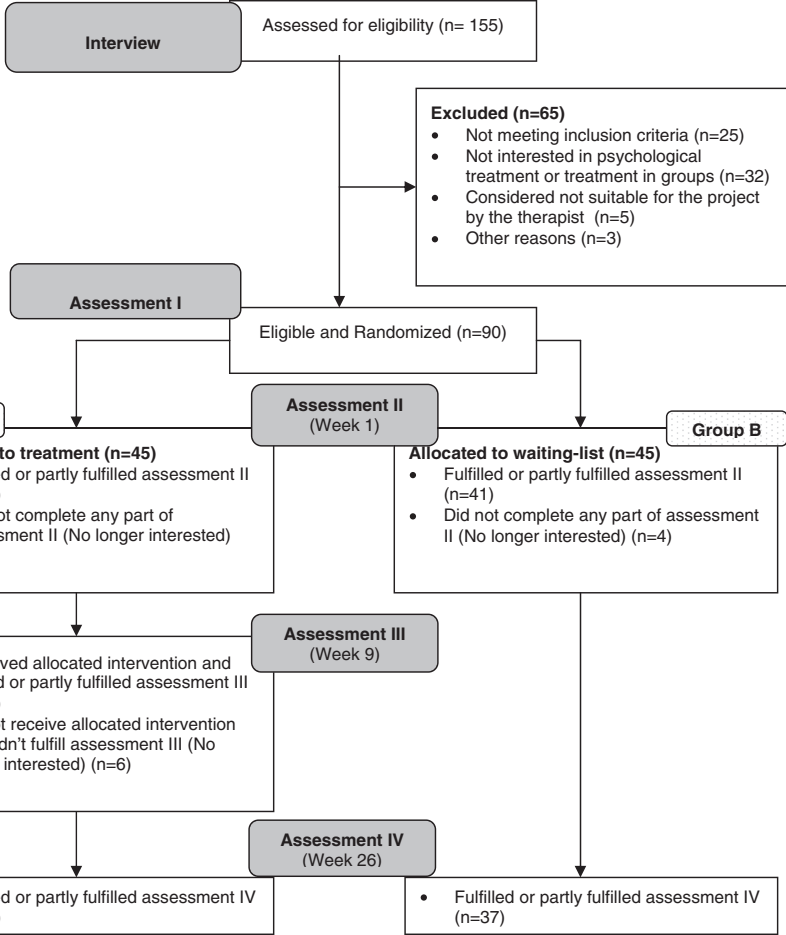

Supplement: MOESM1 [file 9423400]
